# Supplementary material for: Optimization of Xylooligosaccharides Production by Native and Recombinant Xylanase Hydrolysis of Chicken Feed Substrates
Source: MDPI journal article supplement (doi:10.3390/ijms242317110), 2023-12-04
Supplement: s1 [file s1]

SUPPLEMENTARY FIGURES

a

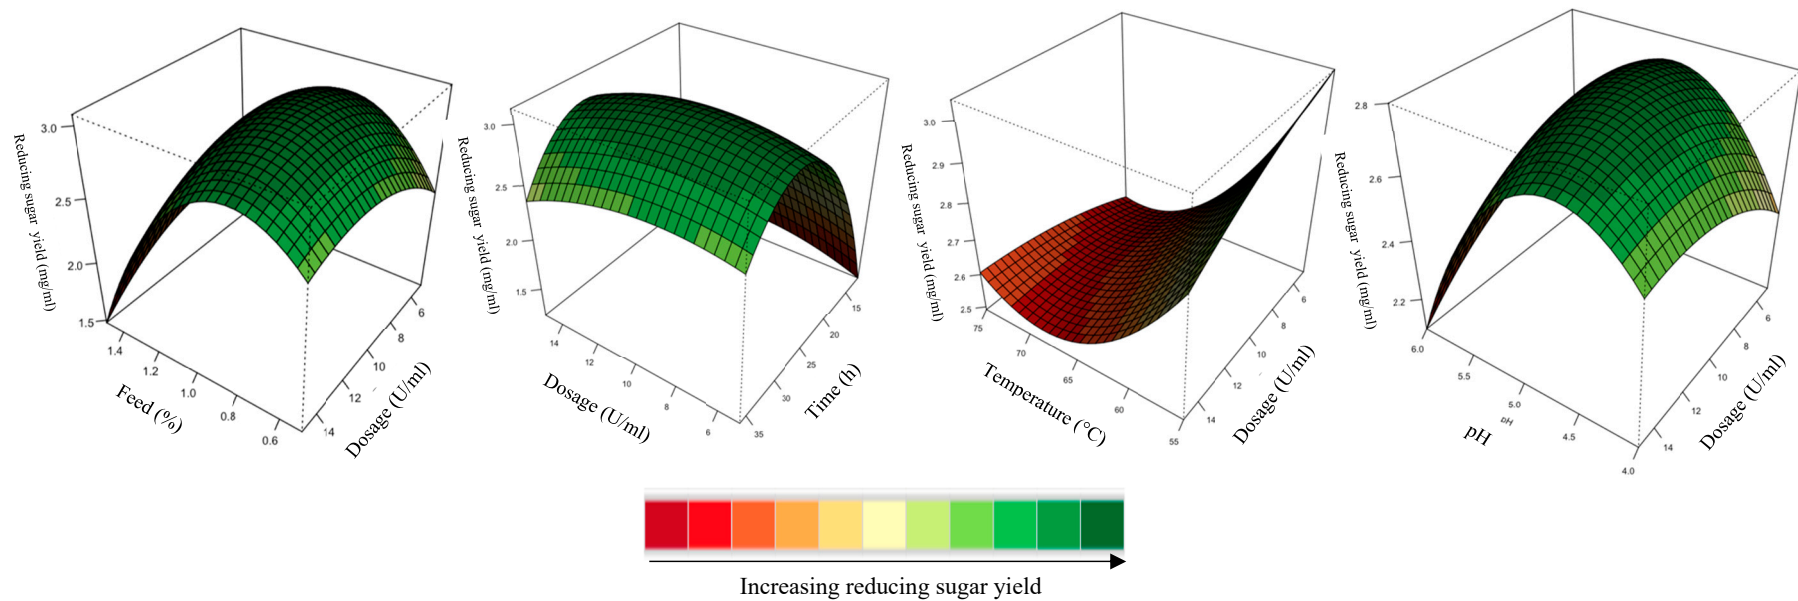

b

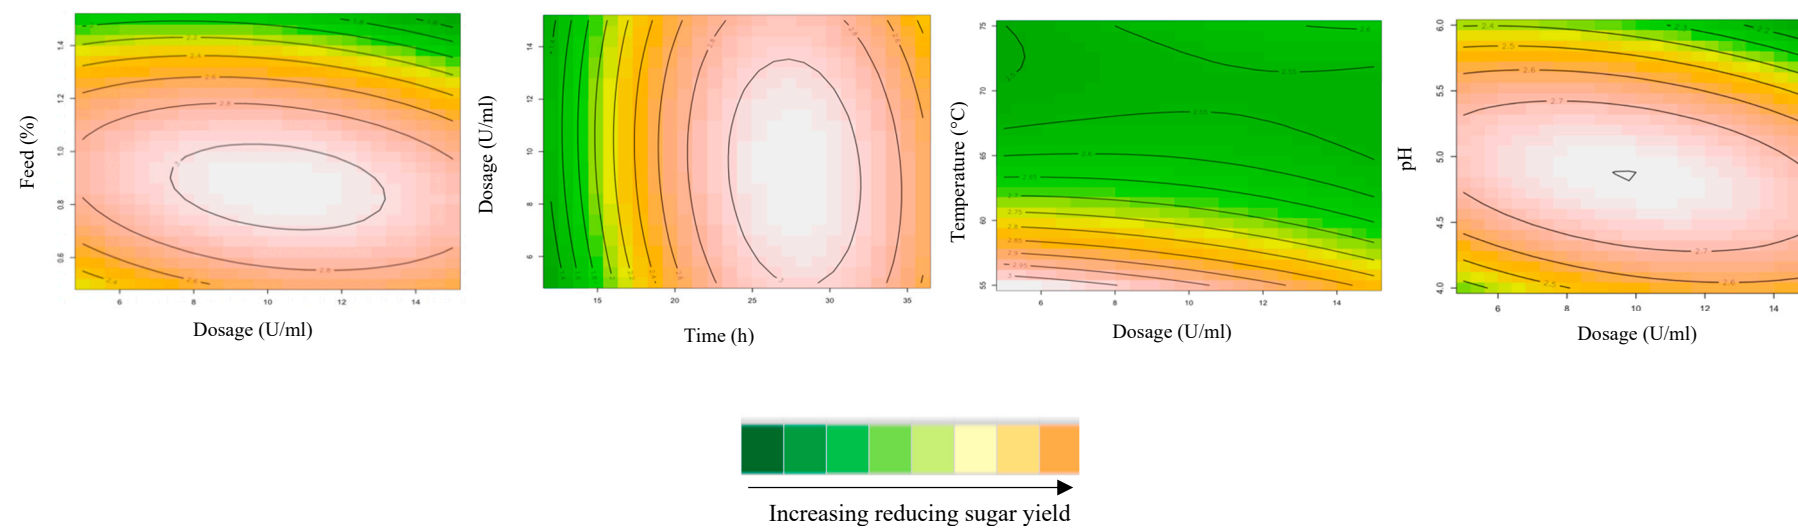

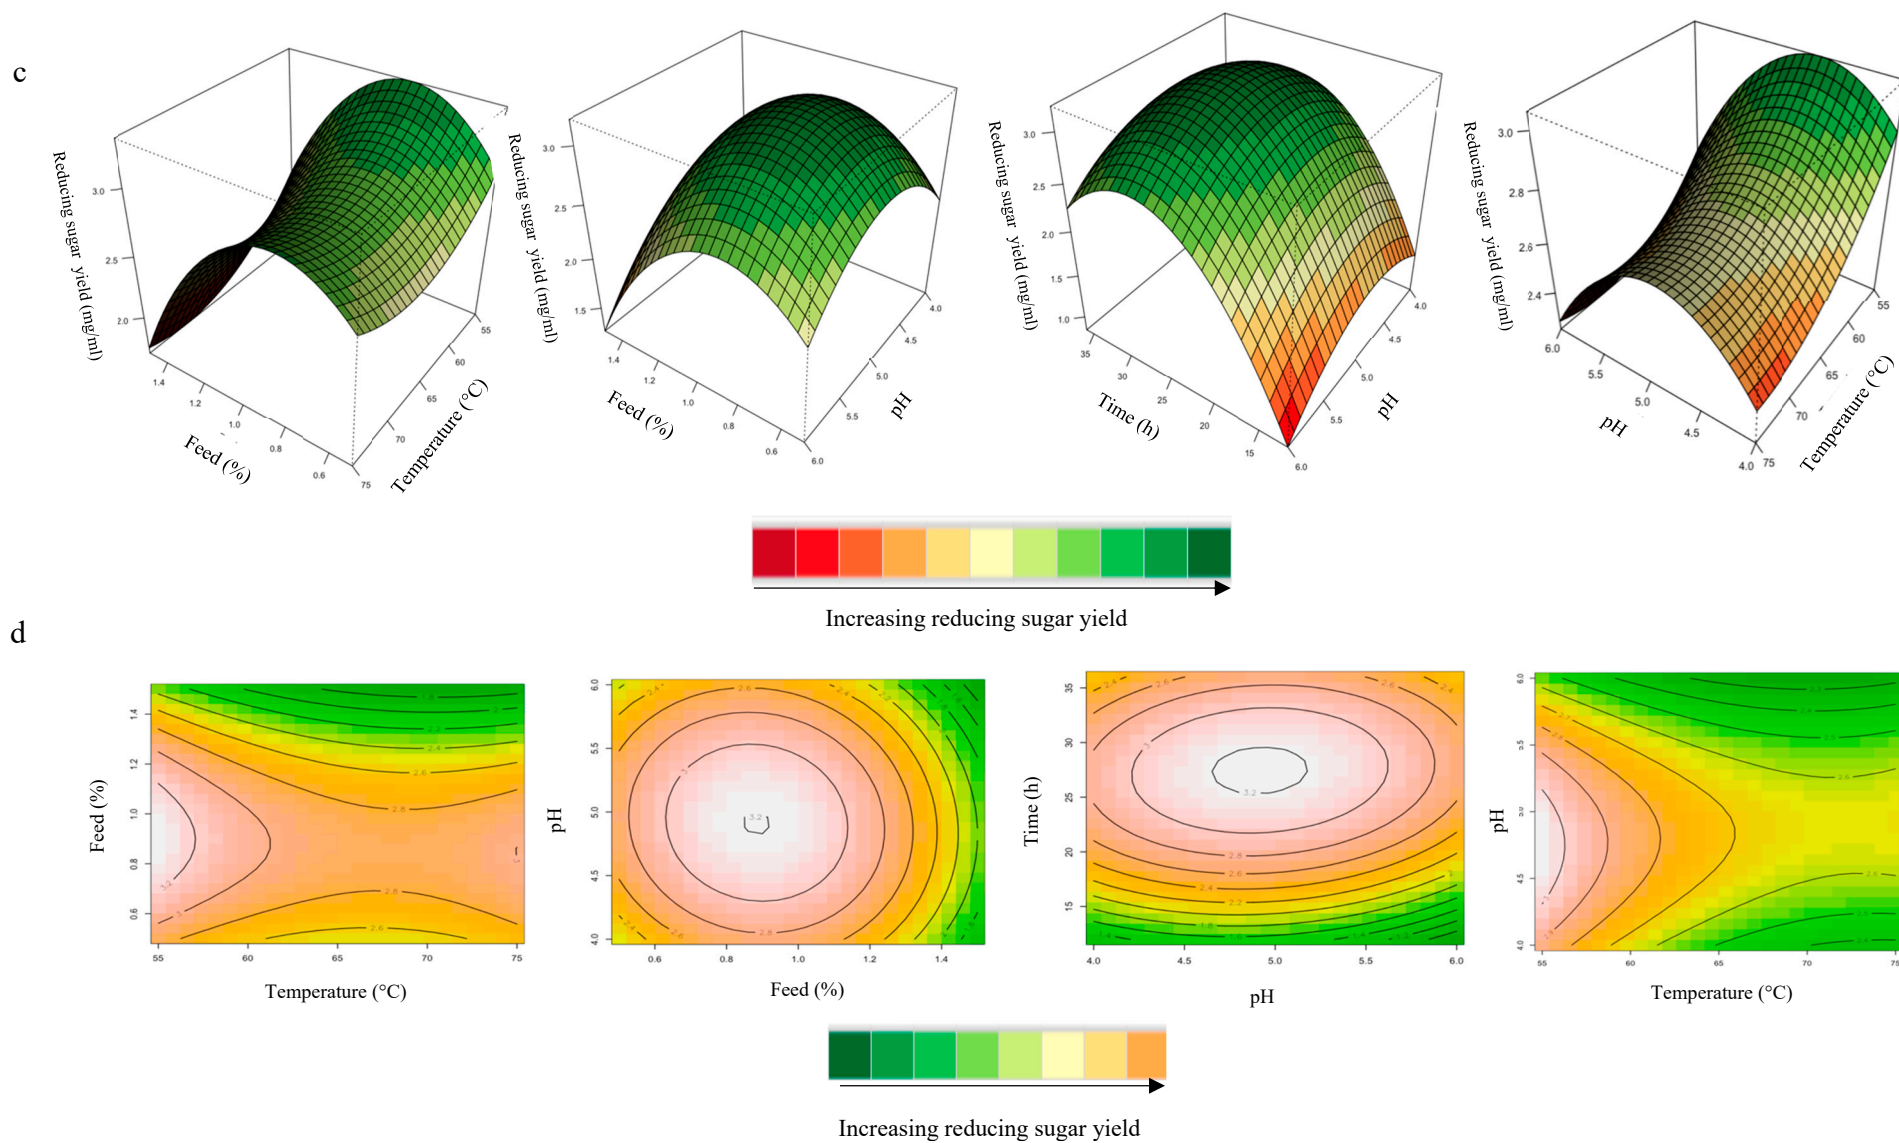

**Figure S1:** 3D- response surface plots (a and c) and contour plots (b and d) of the combined effects of variables on reducing sugar yield by crude *T. harzianum* xylanase of starter chicken feed.

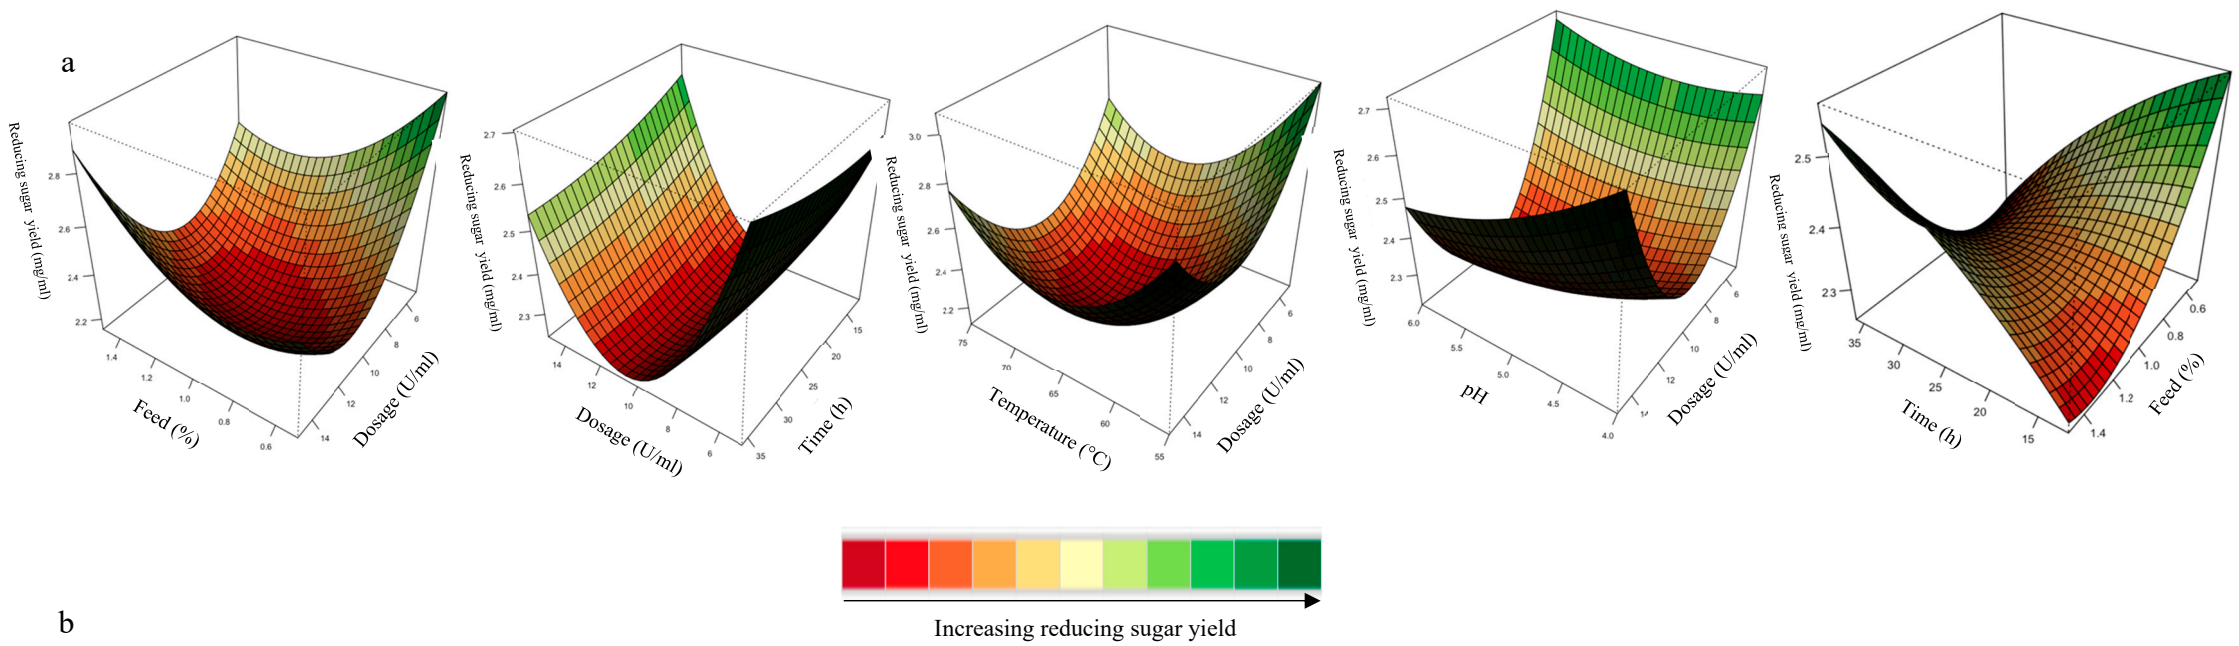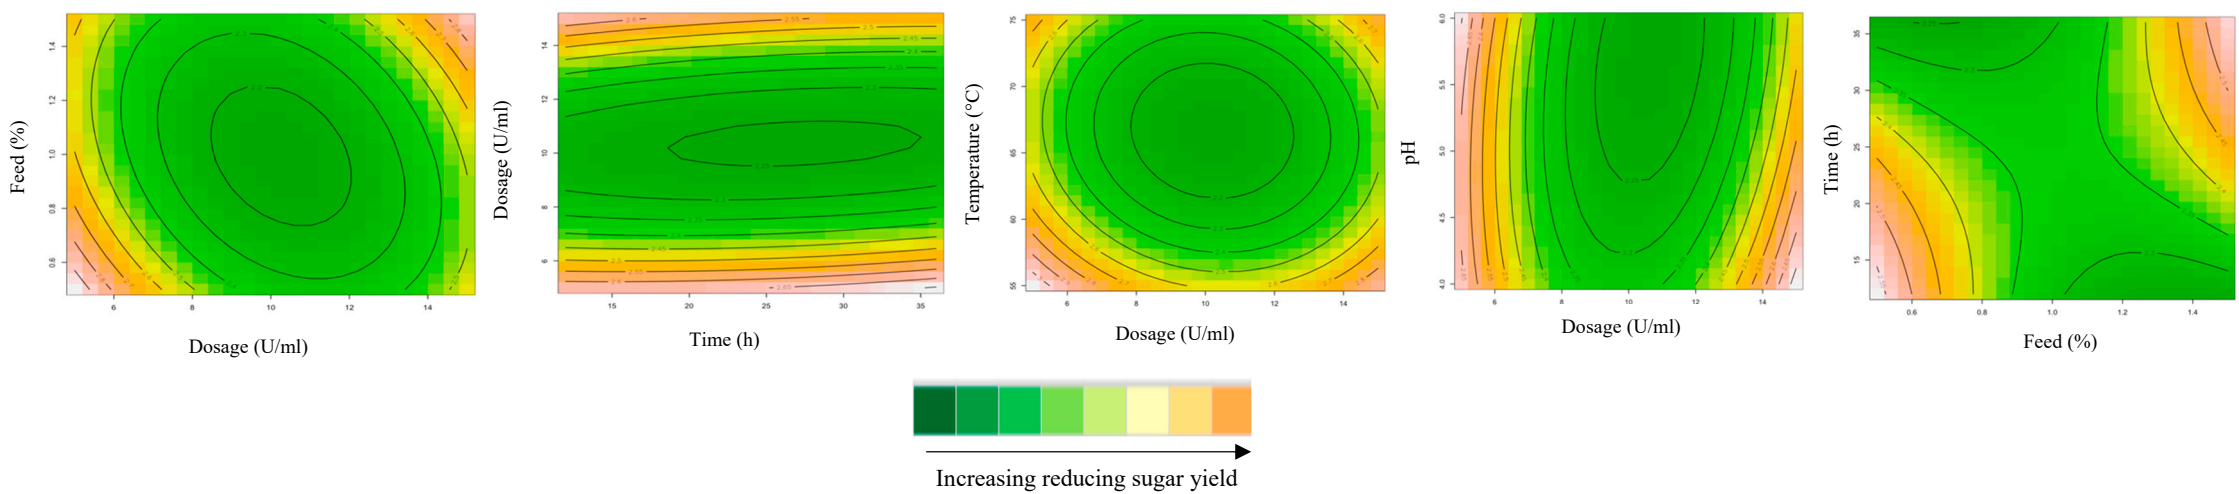



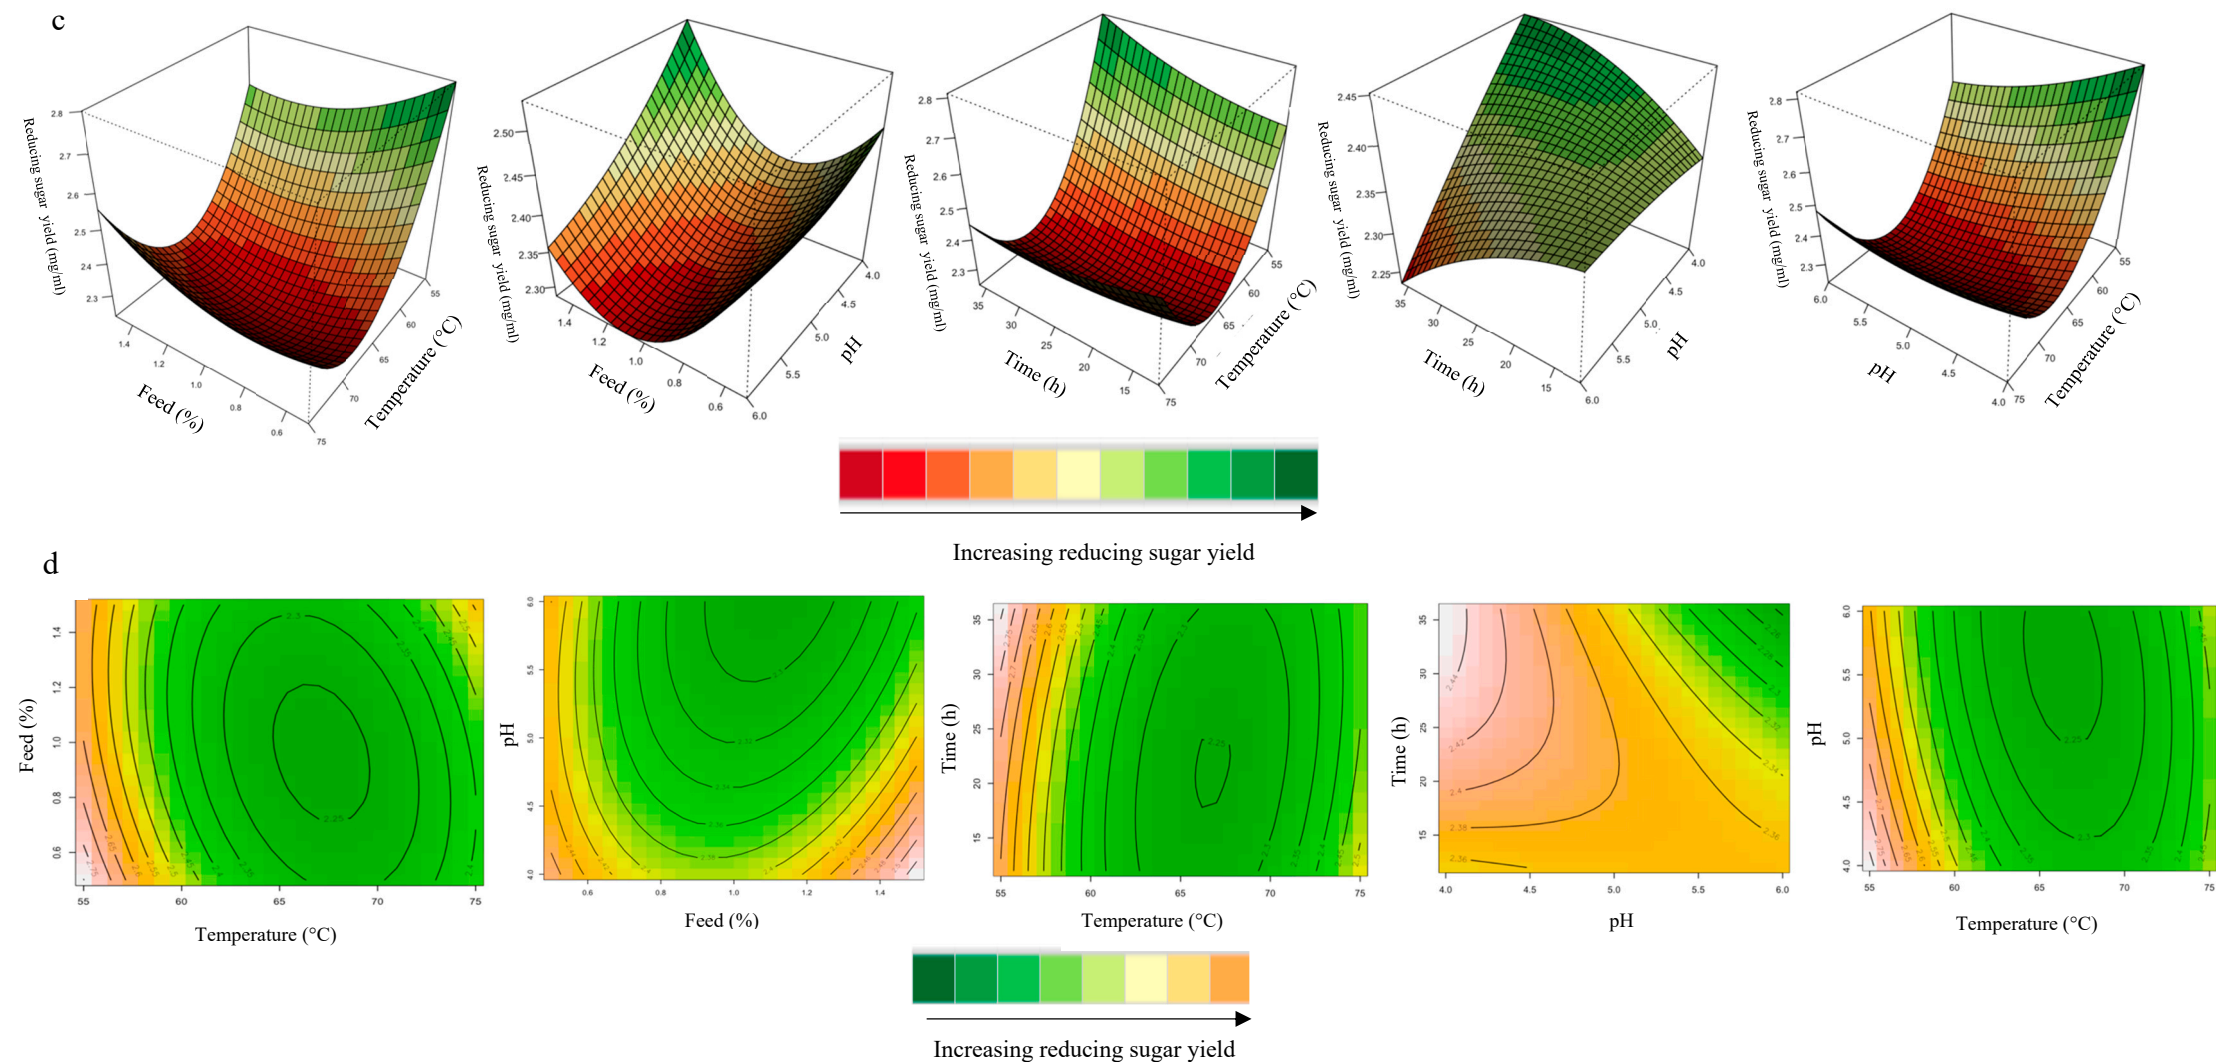

**Figure S2:** 3D- response surface plots (a and c) and contour plots (b and d) of the combined effects of variables on reducing sugar yield by crude *T. harzianum* xylanase of grower chicken feed.



a

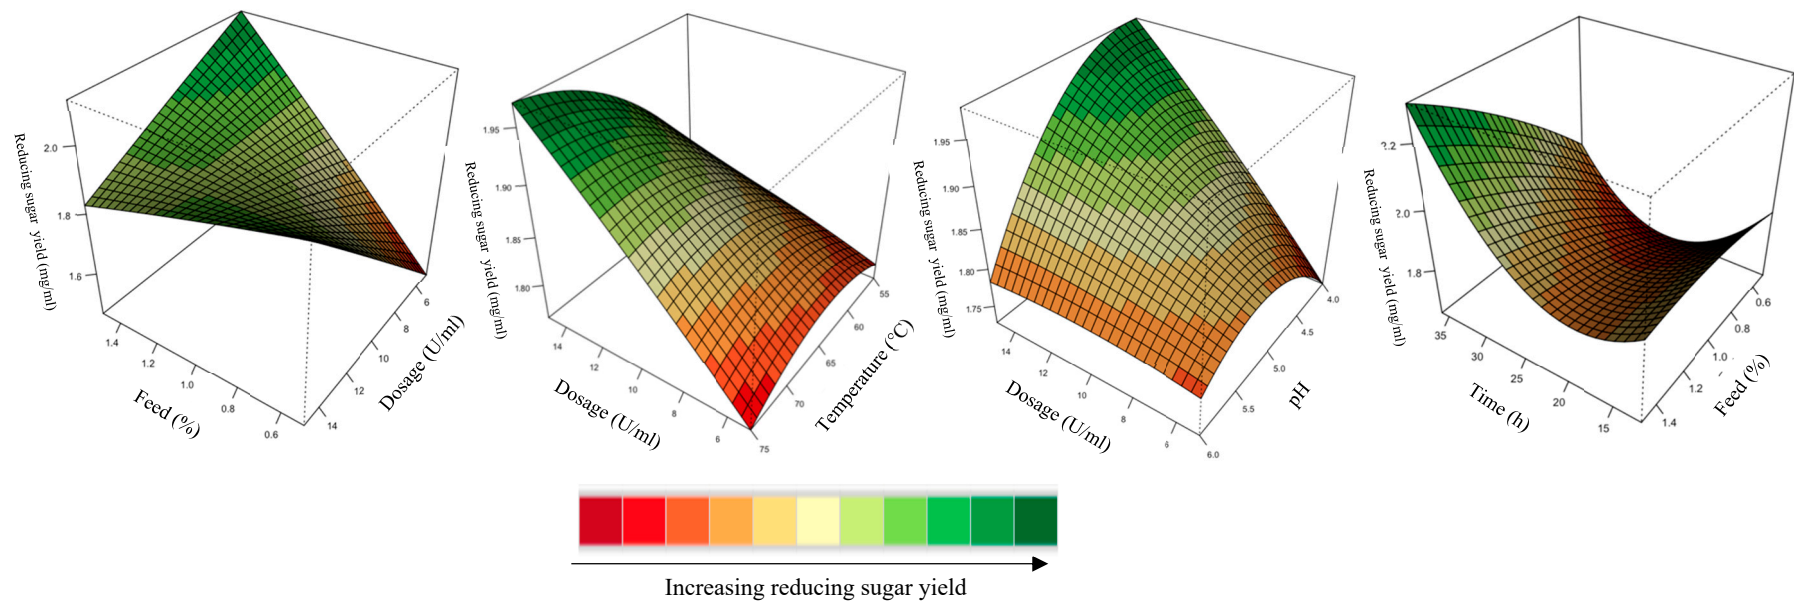

b

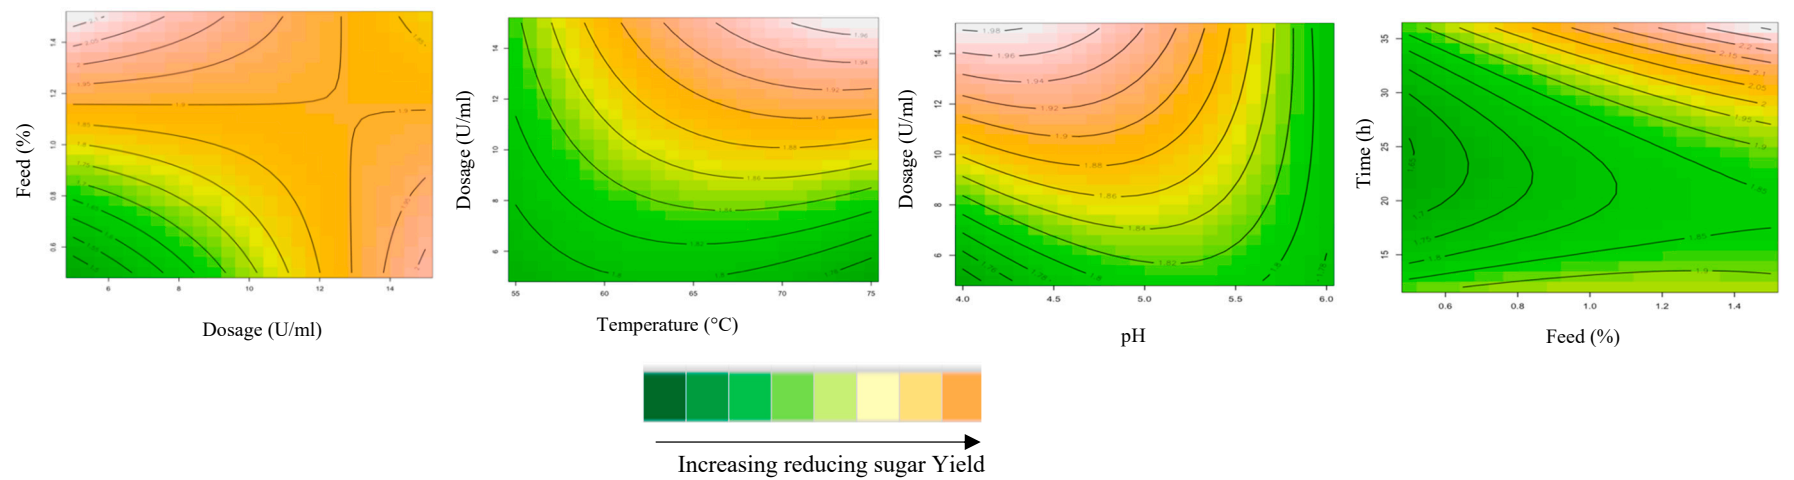

c

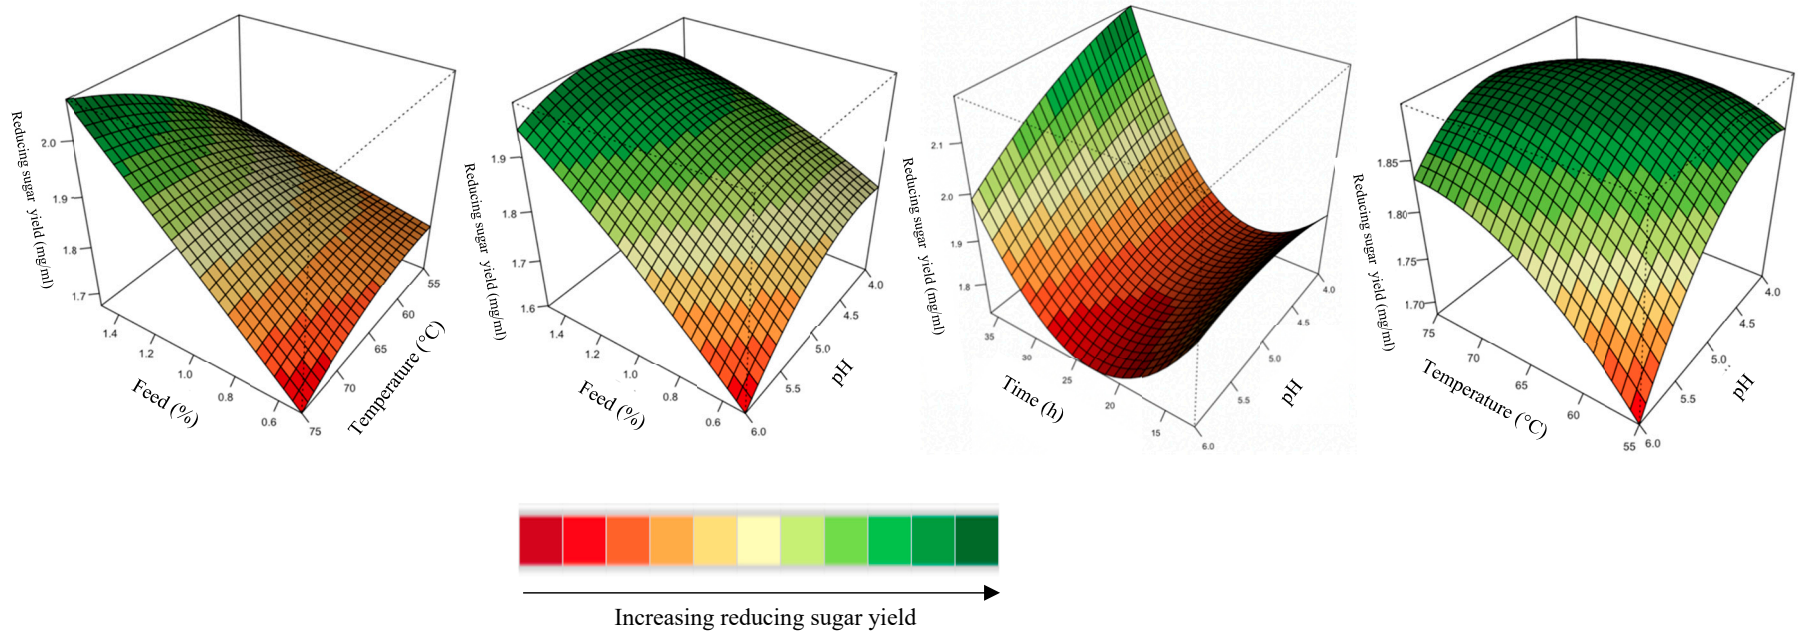

d

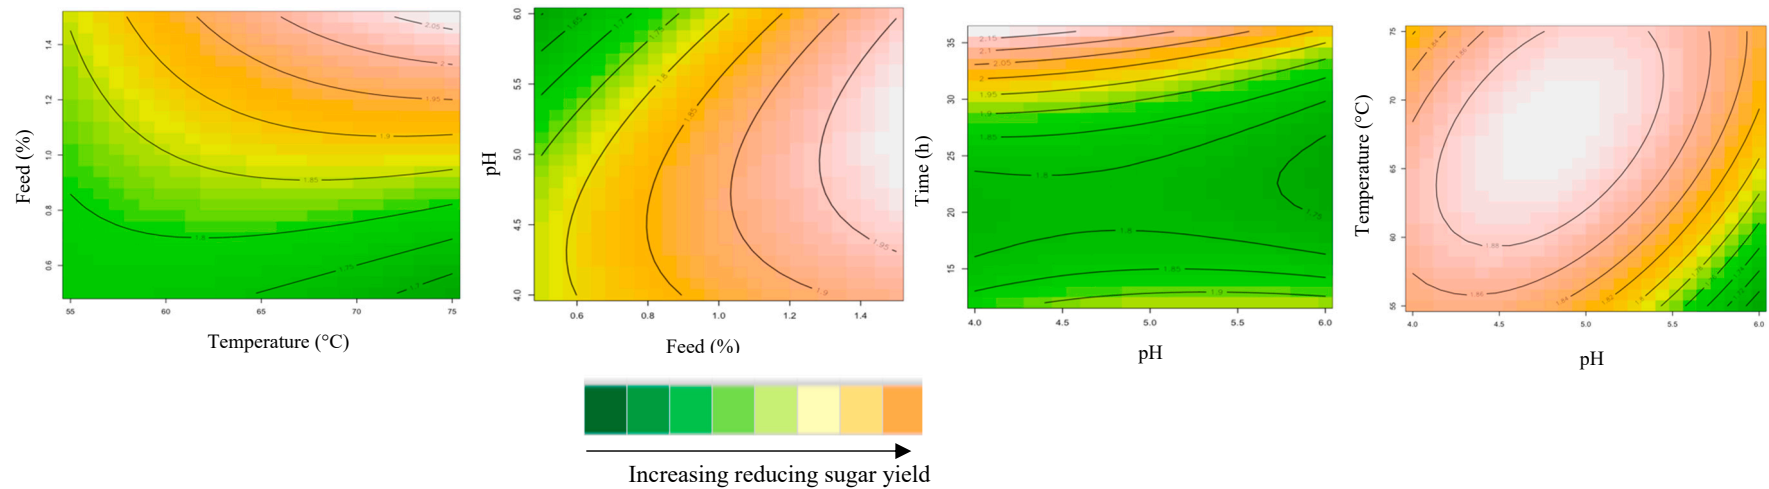

**Figure S3:** 3D- response surface plots (a and c) and contour plots (b and d) of the combined effects of variables on reducing sugar yield by purified *T. harzianum* xylanase of starter chicken feed.

a

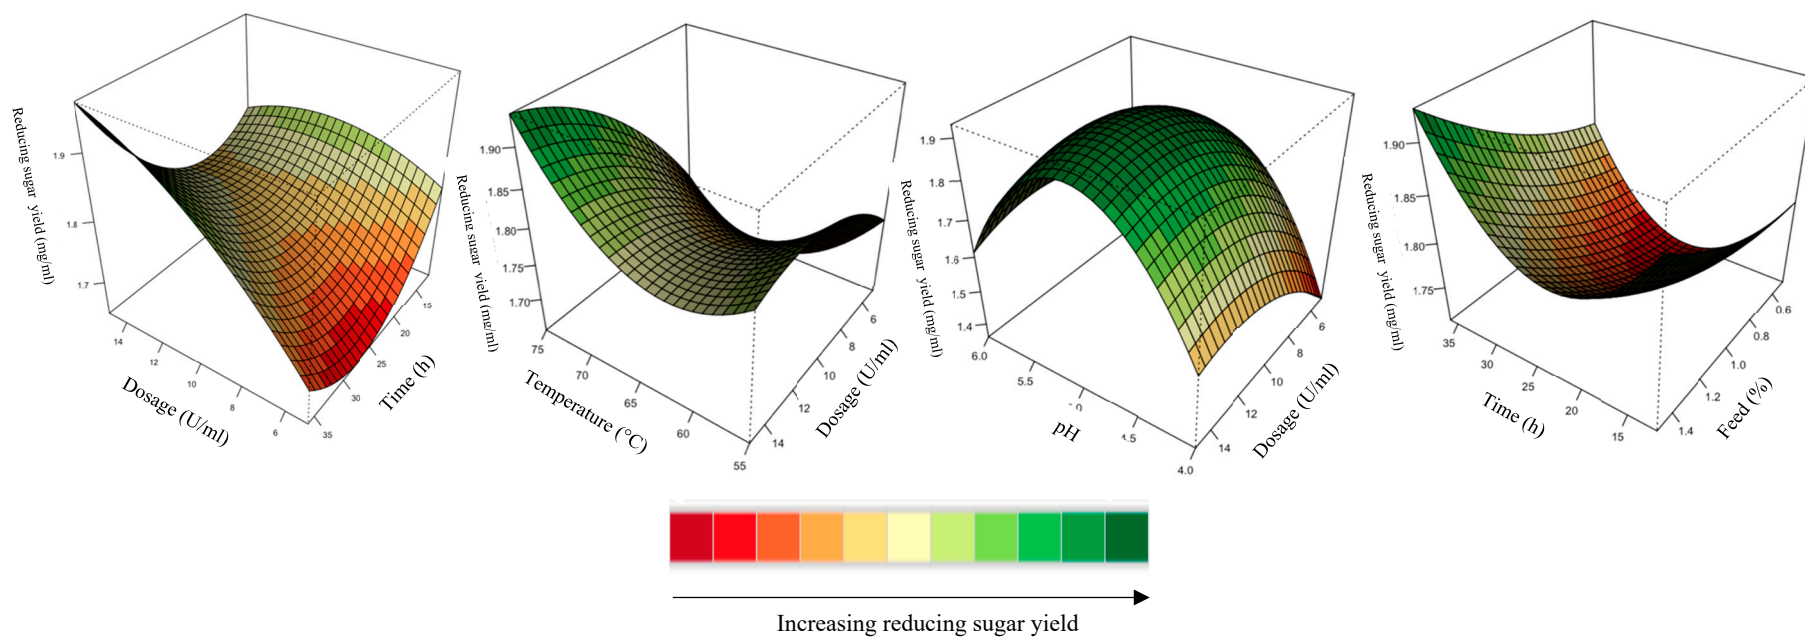

b

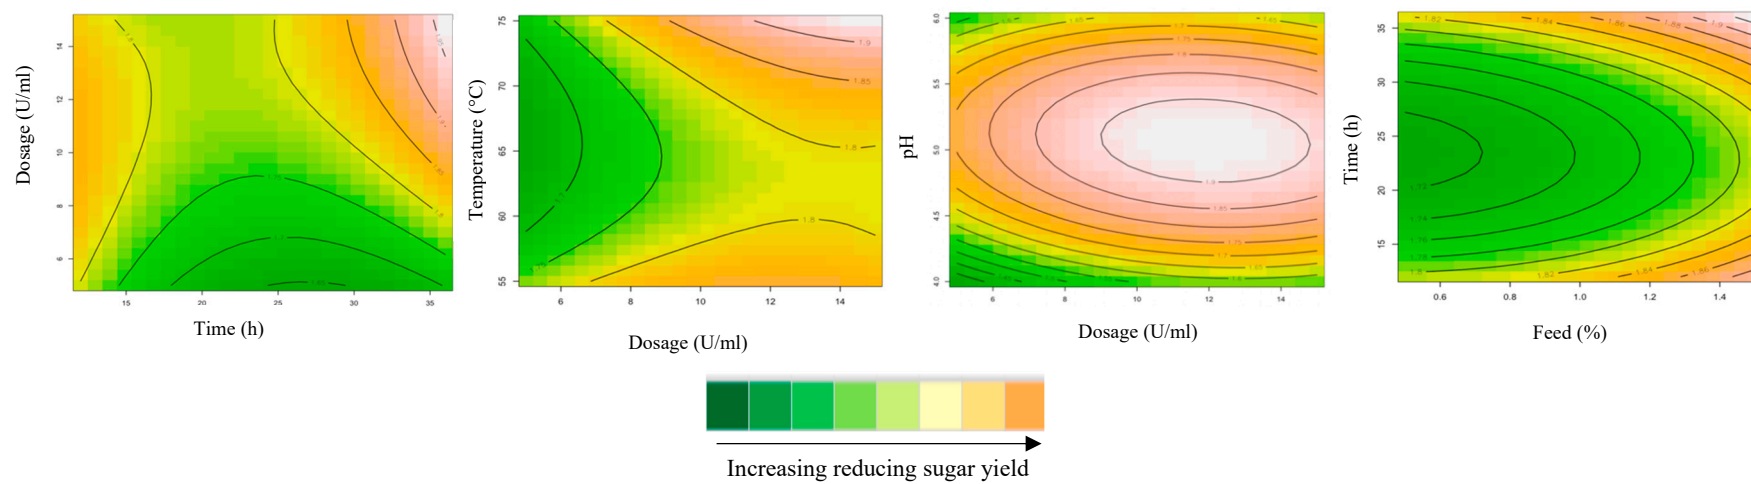



c

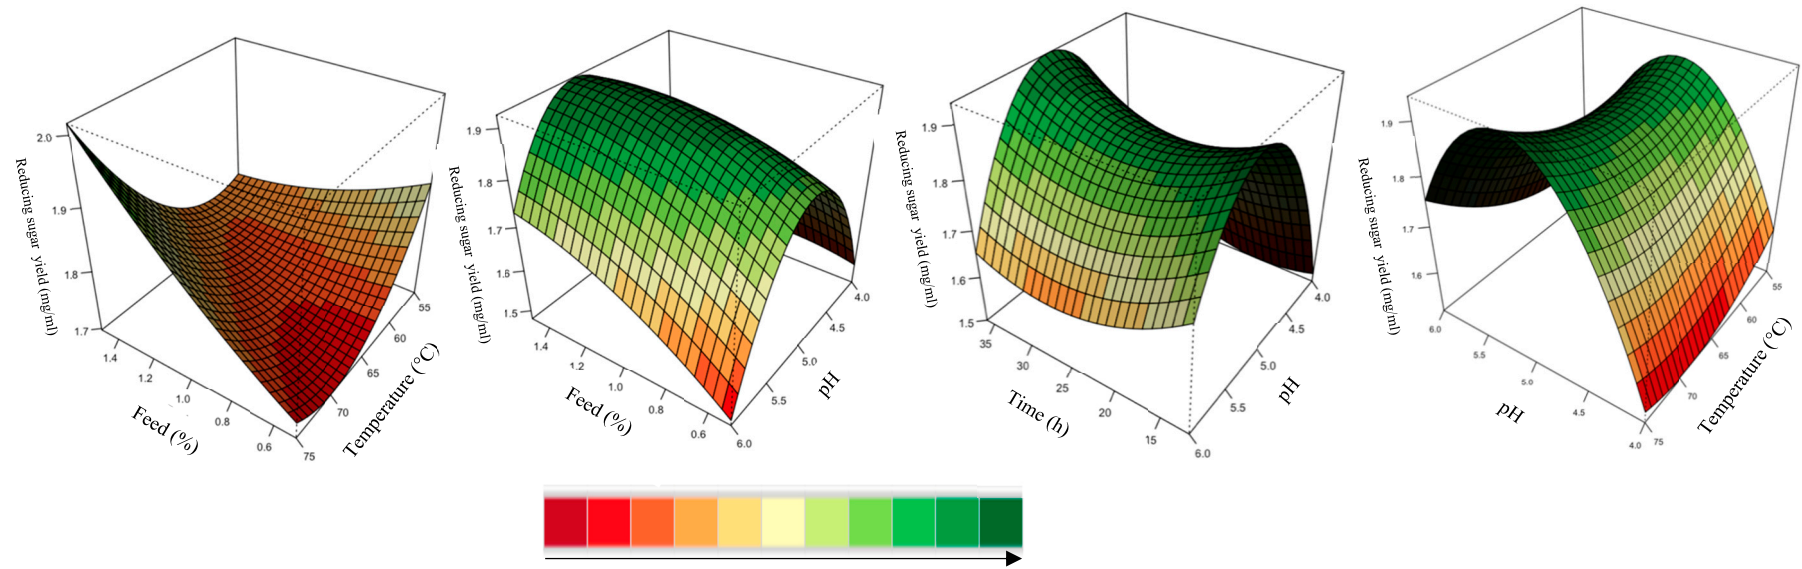

d

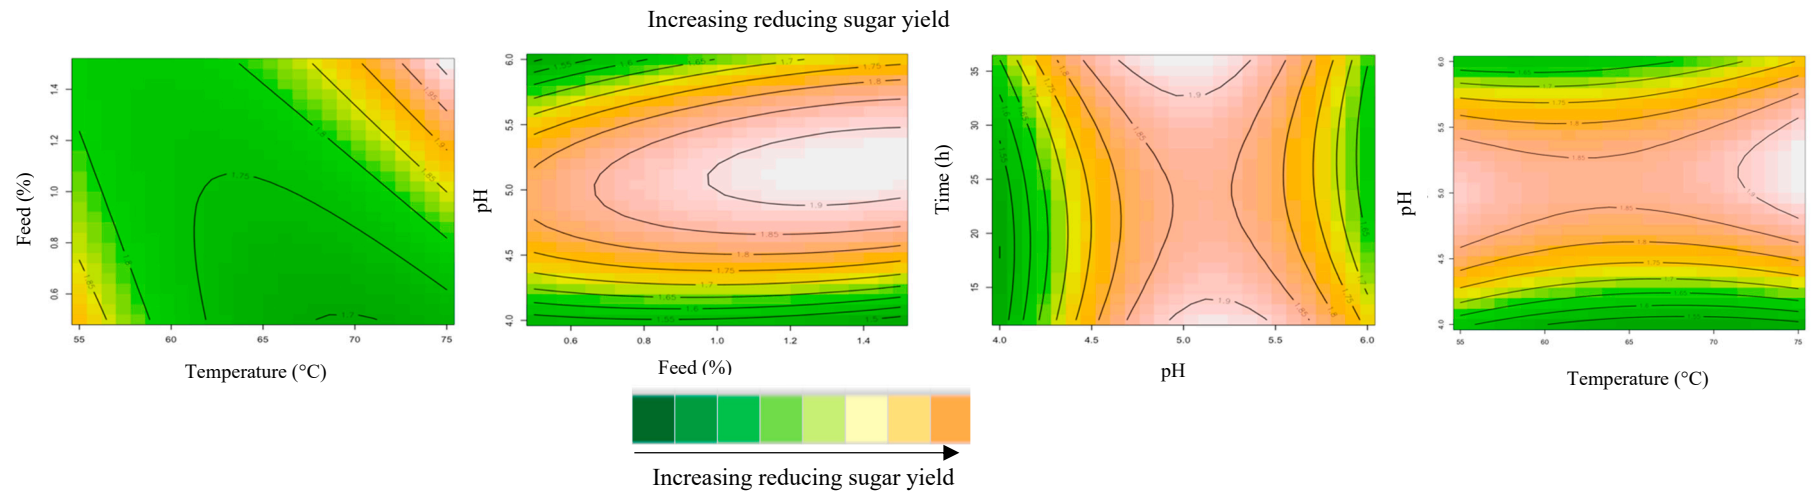

**Figure S4:** 3D- response surface plots (a and c) and contour plots (b and d) of the combined effects of variables on reducing sugar yield by purified *T. harzianum* xylanase of grower chicken feed.

a

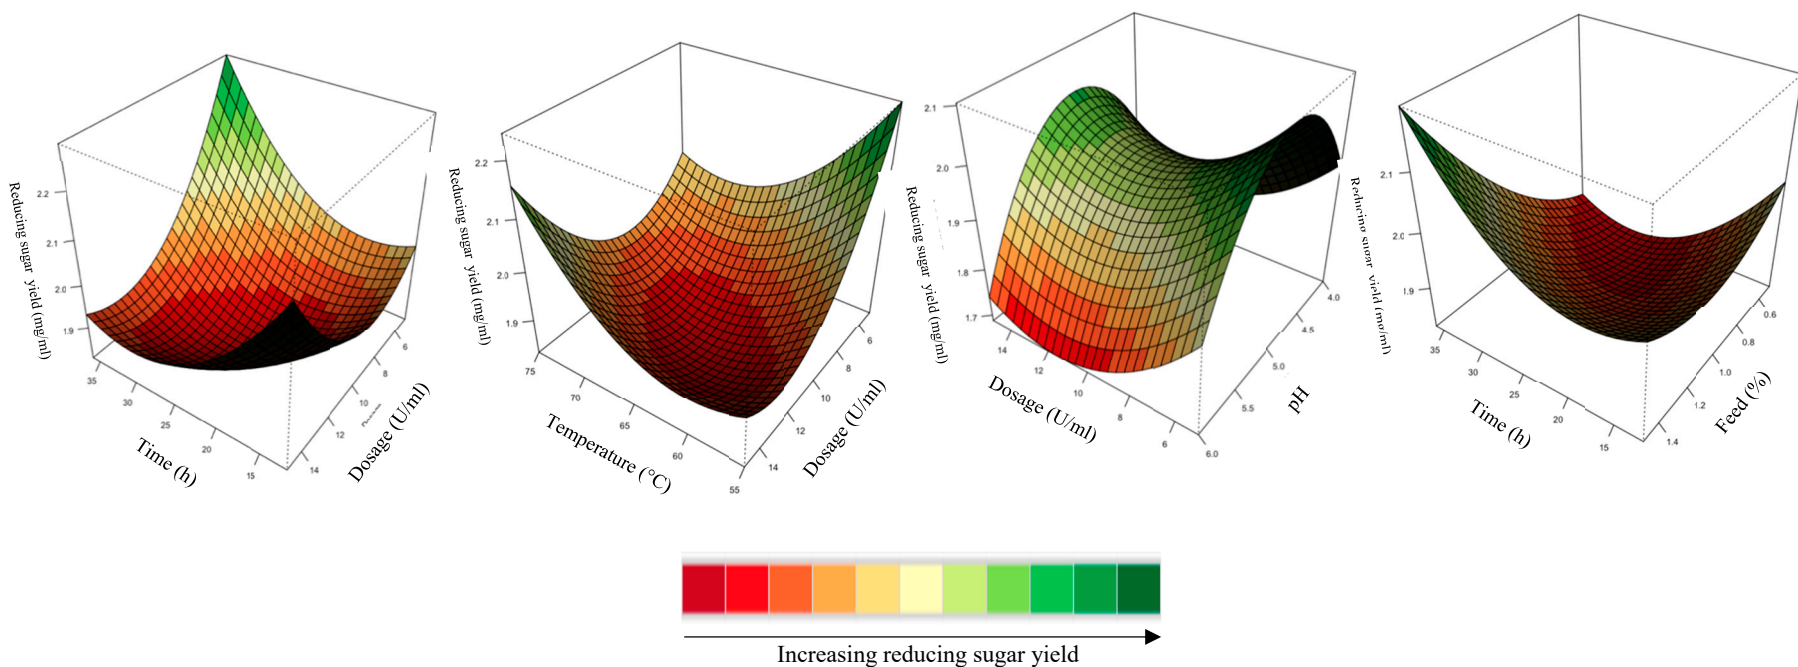

b

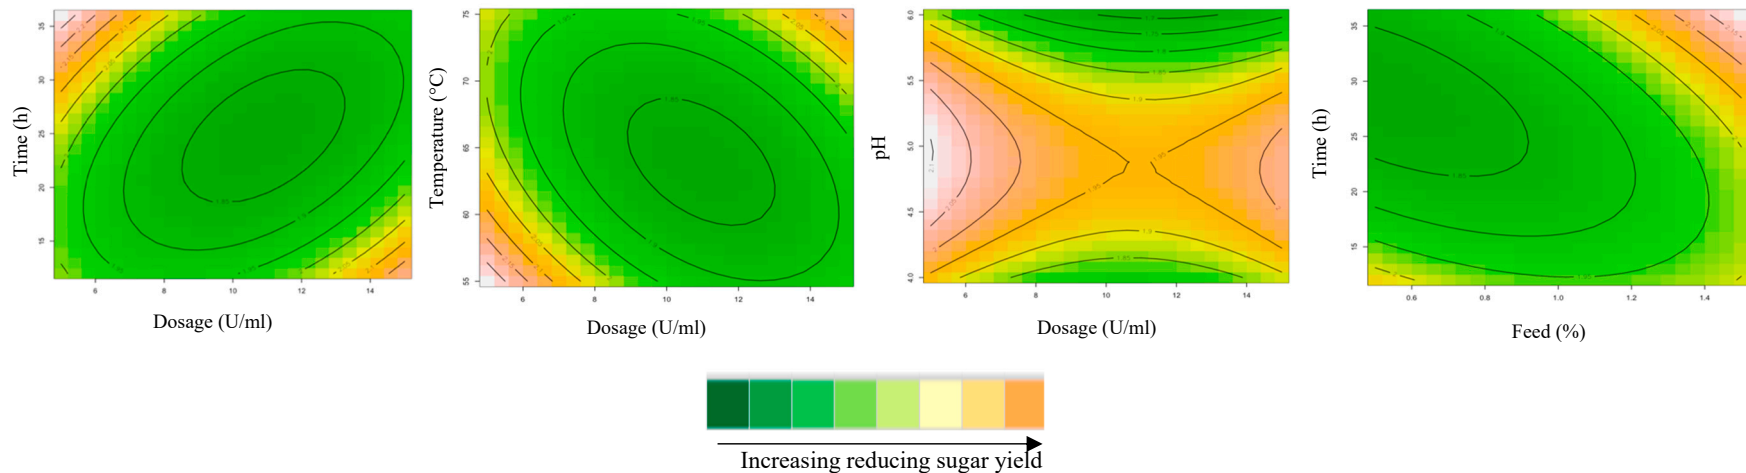

c

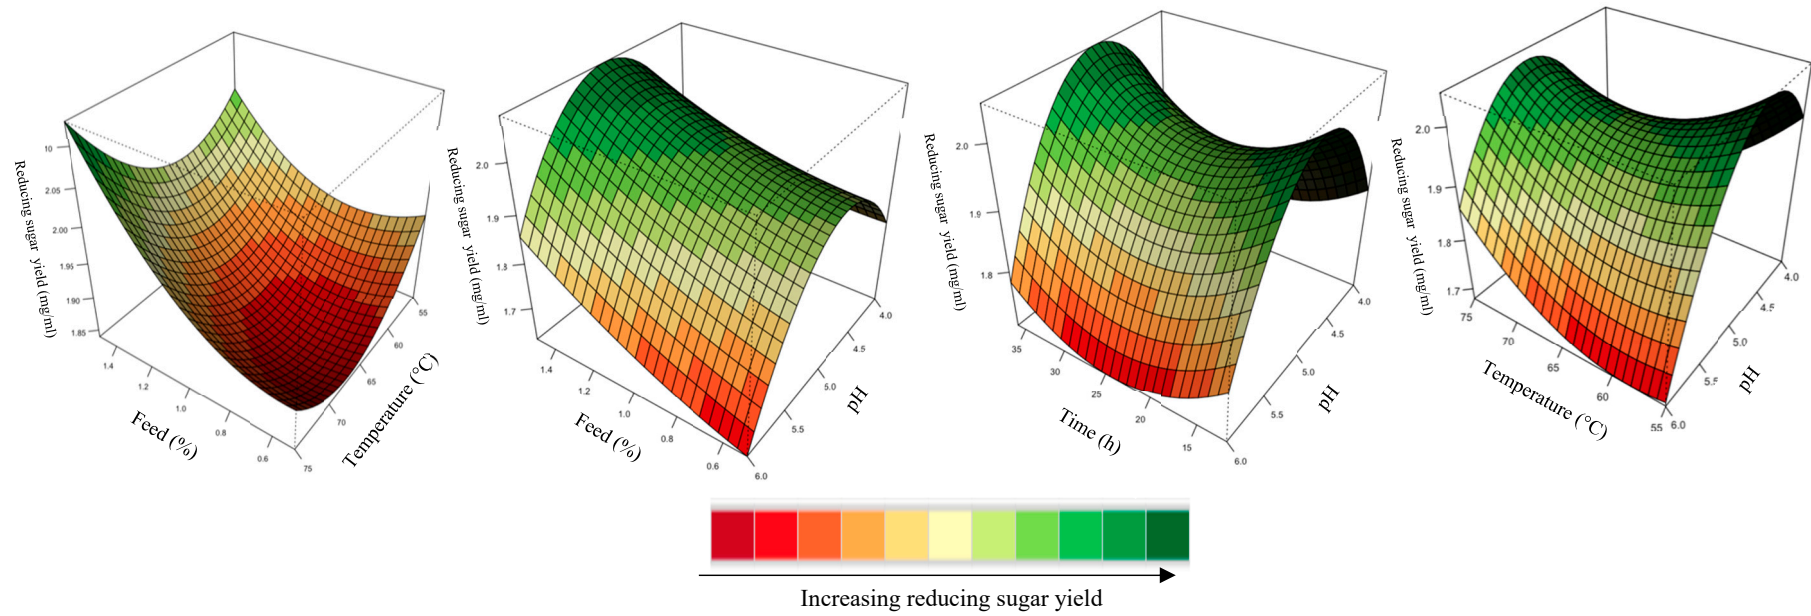

d

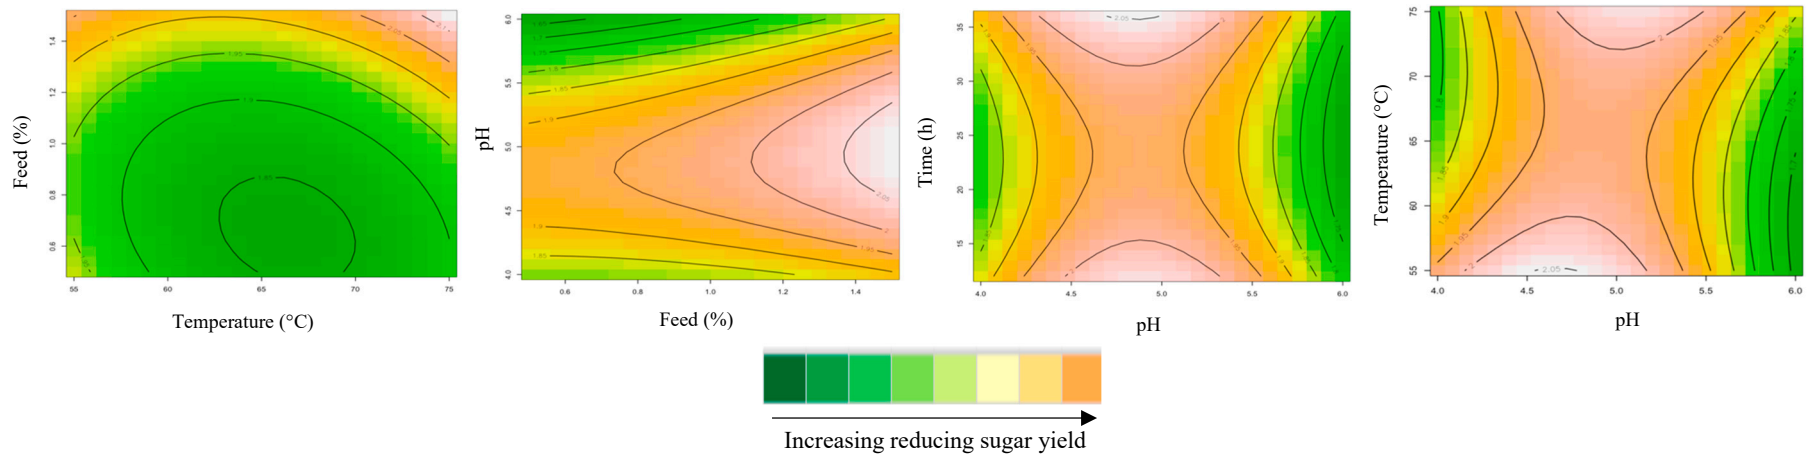

**Figure S5:** 3D- response surface plots (a and c) and contour plots (b and d) of the combined effects of variables on reducing sugar yield by purified XT6 of starter chicken feed.



a

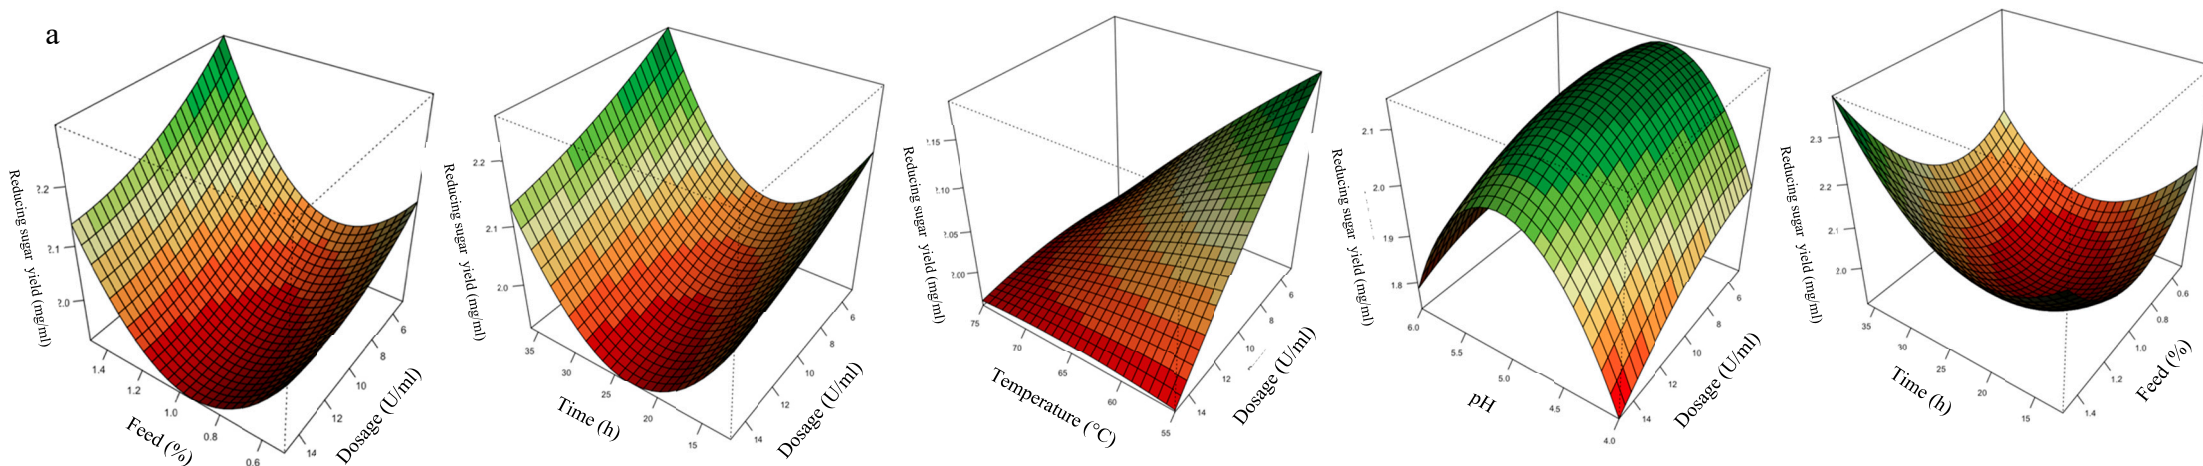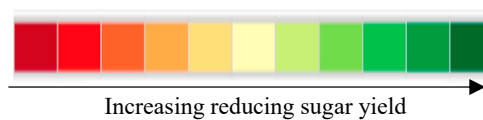

b

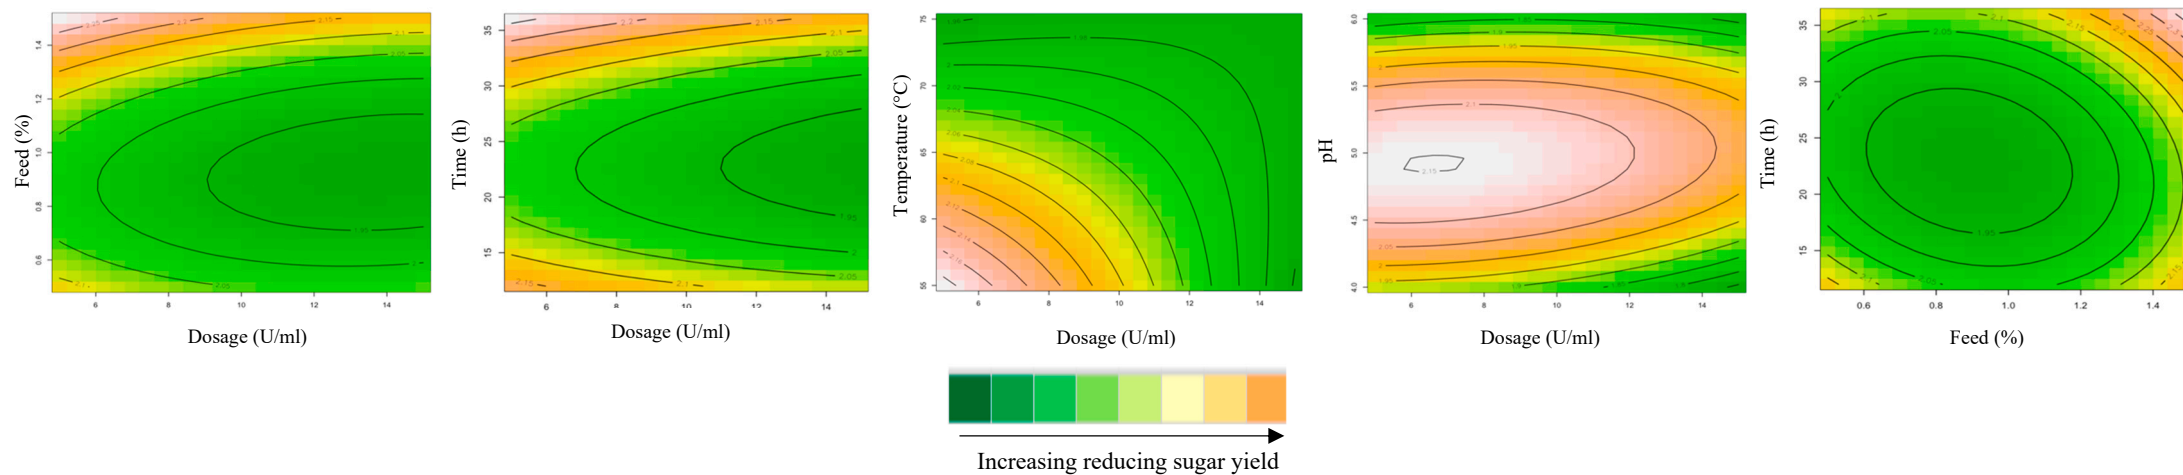

c

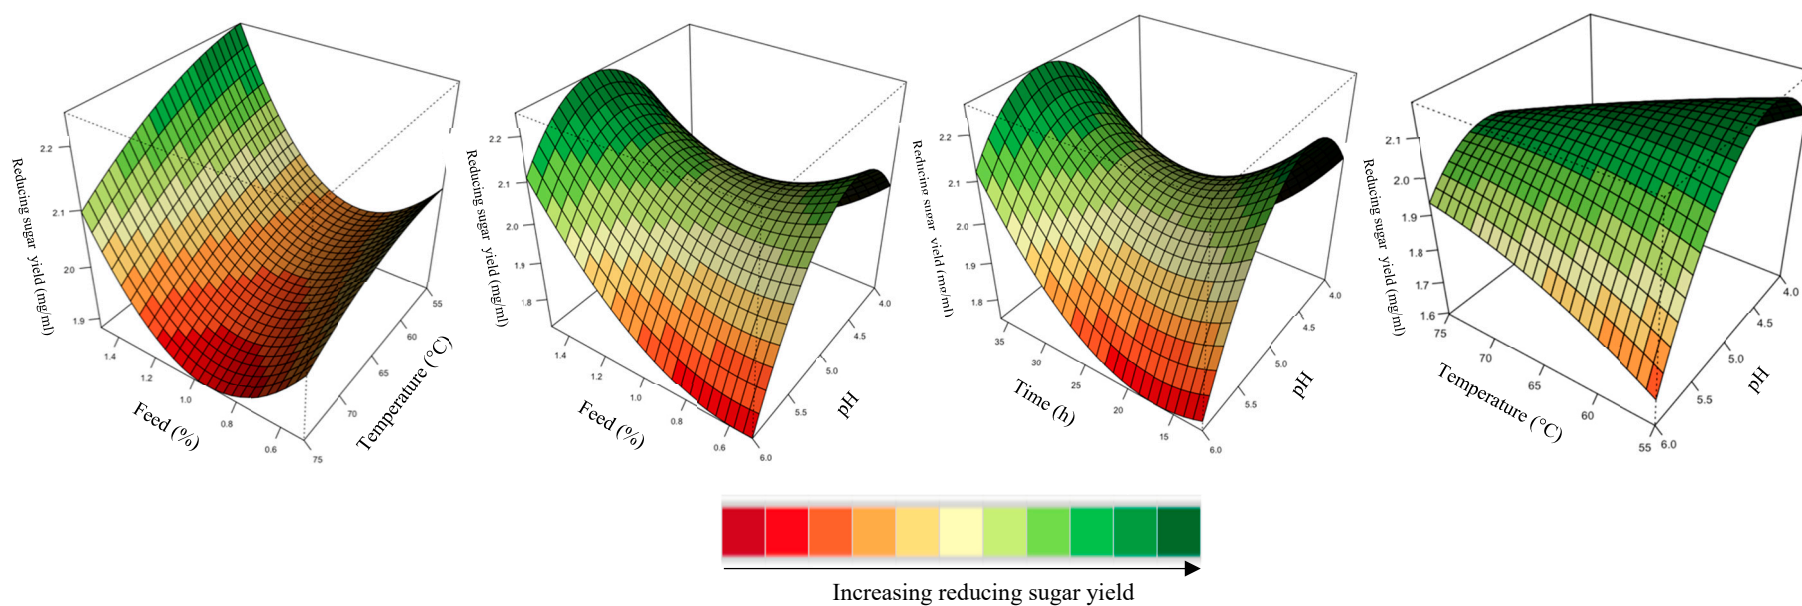

d

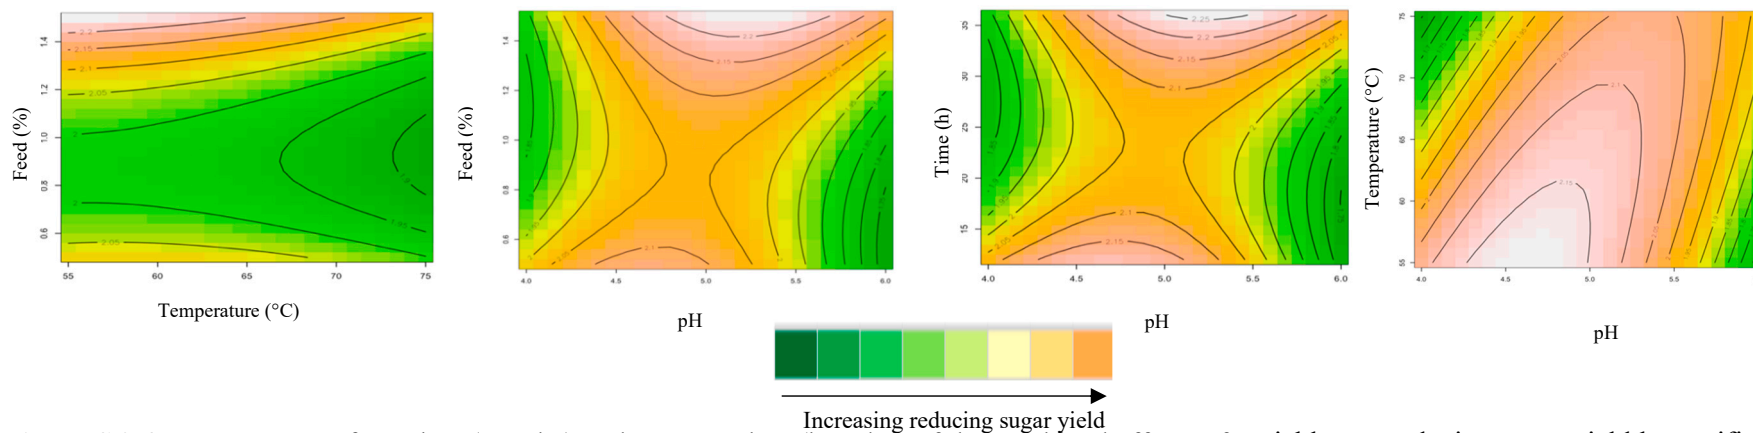

**Figure S6:** 3D- response surface plots (a and c) and contour plots (b and d) of the combined effects of variables on reducing sugar yield by purified XT6 of grower chicken feed.
